# Supplementary material for: Metal–organic framework-derived hierarchical ultrathin CoP nanosheets for overall water splitting
Source: Royal Society of Chemistry journal article supplement (doi:10.1039/d0ta07616c), 2020-01-01
Supplement: d0ta07616c1.pdf [file d0ta07616c1.pdf]

# Supplementary Information

## Metal-Organic Framework-Derived Hierarchical Ultrathin CoP nanosheets for Overall Water Splitting

Jianglin Liu <sup>a</sup>, Yan Gao <sup>a</sup>, Xinxin Tang <sup>a</sup>, Ke Zhan <sup>a</sup>, Bin Zhao <sup>a</sup>, Bao Yu Xia <sup>b</sup>, Ya Yan <sup>a, \*</sup>

<sup>a</sup> School of Materials Science & Engineering, University of Shanghai for Science and Technology, 516 Jungong Road, Shanghai 200093, PR China

<sup>b</sup> Key laboratory of Material Chemistry for Energy Conversion and Storage (Ministry of Education), Hubei Key Laboratory of Material Chemistry and Service Failure, School of Chemistry and Chemical Engineering, Wuhan National Laboratory for Optoelectronics, Huazhong University of Science and Technology (HUST), 1037 Luoyu Road, Wuhan 430074, PR China

\*Corresponding author. E-mail: [yanya@usst.edu.cn](mailto:yanya@usst.edu.cn) (Y. Yan)

### Experimental details

**Materials and Chemicals:** Nickel(II) nitrate hexahydrate ( $\text{Ni}(\text{NO}_3)_2 \cdot 6\text{H}_2\text{O}$ ), cobalt(II) nitrate hexahydrate ( $\text{Co}(\text{NO}_3)_2 \cdot 6\text{H}_2\text{O}$ ), sodium hypophosphite monohydrate ( $\text{NaH}_2\text{PO}_2 \cdot \text{H}_2\text{O}$ ), 2-methylimidazole (2-MeIm) and potassium hydroxide were purchased from Adamas Reagent Co., Ltd. Nickel foam (thickness: 1.6 mm) was obtained from CeTech Co., Ltd. Commercial Pt/C catalyst (20 wt%) were bought from Johnson Matthey Company (Shanghai, China).  $\text{IrO}_2$  and nafion (5 % wt.) were obtained from Afar Aesar. All chemicals were used without further purification.

**Synthesis of Co-MOF/NF:** In a typical fabrication procedure, 2 mmol  $\text{Co}(\text{NO}_3)_2 \cdot 6\text{H}_2\text{O}$  and 16 mmol 2-MeIm were dissolved in 40 mL deionized water to form two clear solution, respectively. Then, the solution of 2-MeIm was subsequently poured into the solution of  $\text{Co}(\text{NO}_3)_2 \cdot 6\text{H}_2\text{O}$  with a piece of clean Ni foam, which was kept at room temperature for 3 h. The reacted sample with blue color was taken out and washed with

methanol several times, and dried at 60 °C to obtain Co-MOF precursor. To perform the concentration-dependent experiments, the molar ratio of  $\text{Co}(\text{NO}_3)_2 \cdot 6\text{H}_2\text{O}$  and 2-MeIm was tuned at 1:4 and 1:16 to instead the original one (1:8), respectively (Figure S2).

**Synthesis of hierarchical  $\text{Co}(\text{OH})_2/\text{NF}$ :** A piece of Co-MOF/NF was immersed into an ethanol solution (100 mL) containing  $\text{Co}(\text{NO}_3)_2 \cdot 6\text{H}_2\text{O}$  (3 mmol) with stirring for 30 min. The obtained  $\text{Co}(\text{OH})_2$  sample was then taken out, washed with ethanol, and dried in 60 °C. To perform the etching time-dependent experiments, a series of etching time including 0, 10, and 60 min were employed.

**Synthesis of hierarchical CoP/NF:** In the typical synthesis procedure, a piece of  $\text{Co}(\text{OH})_2/\text{NF}$  intermediate and  $\text{NaH}_2\text{PO}_2 \cdot \text{H}_2\text{O}$  (0.1 g) were placed at the downstream and upstream sides of the tube furnace, respectively. Then the samples were heated at 300 °C for 60 min with a heating speed of 2 °C/min under Ar atmosphere. Noted that the mass loading of active material of pure CoP on NF is about 2.1 mg  $\text{cm}^{-2}$ . To perform the temperatures-dependent experiments, the different annealing temperatures including 250 and 350 °C were employed. For comparison, all intermediates with different etching time were thermal-annealed under the same conditions.

**Synthesis of L-CoP/NF:** The large-size cobalt hydroxide precursors (L- $\text{Co}(\text{OH})_2$ ) were grown by electrodeposition in  $\text{Co}(\text{NO}_3)_2$  aqueous solution (2 mmol 100 mL) with a three-electrode system. A piece of nickel foam (1\*2 cm), a platinum plate and a Ag/AgCl were used as working electrode, counter electrode and reference electrode, respectively. The electrodeposition of cobalt hydroxide was performed at room temperature applying a constant potential of -1.0 V (vs. Ag/AgCl). After deposition for 5 min, the resulting green sample was carefully rinsed several times with deionized water, and finally dried at 60 °C. The L-CoP/NF sample was prepared by the same phosphidation method as described above, except that the precursor was L- $\text{Co}(\text{OH})_2/\text{NF}$ .

**Materials characterization:** The morphologies were characterized with field-emission scanning electron

microscopy (FE-SEM, Quanta FEG450) and transmission electron microscopy (TEM, FEI, TECNAI F30). The elemental composition and distribution was investigated with Energy dispersive X-ray spectroscopy (EDX, JEOL-2010) attached to the FE-SEM. The surface structure of the composites was characterized by An Autosorb IQ Gas Sorption System at 77 K. X-ray diffraction (XRD) spectrum was measured by Bruker D8-Advance X-ray diffractometer with Cu K $\alpha$  radiation to analyze crystal structure of the samples. The Raman spectrum of as-prepared samples was conducted with a LabRAM HR 800 system at 532 nm laser. FT-IR spectra were recorded in the range of 4000–450  $\text{cm}^{-1}$  with a 92 JASCO FT/IR-460 spectrophotometer. X-ray photoelectron spectroscopy (XPS, ESCALAB250Xi, Thermo) was carried out to analyze chemical composition and valence states of the constituent elements in the samples.

**Electrochemical measurement:** All electrochemical measurement was performed in a standard three-electrode system on CHI760E electrochemical workstation (Chenhua, shanghai), while using the as-obtained catalysts on NF as the working electrode, a carbon rod as the counter electrode, and an Ag/AgCl as the reference electrode. 1 M KOH, 1 M PBS and 0.5 M H $_2$ SO $_4$  were employed as the electrolyte solution. For HER, the linear sweep voltammograms (LSVs) were measured in a potential range of 0 to -0.5 V vs RHE at a scan rate of 5  $\text{mV s}^{-1}$ , while for OER, the LSVs were obtained from 1.0 to 1.8 V vs RHE at a scan rate of 2  $\text{mV s}^{-1}$ . Electrochemical impedance spectroscopy (EIS) was measured in the frequency range of 0.01 Hz to 100 kHz with a 5 mV AC dither for HER and OER, respectively. Cyclic voltammograms (CVs) were tested at different scan rates, which are employed to estimate the double-layer capacitances ( $C_{dl}$ ) of the catalysts. Chronopotentiometry curves were obtained with a constant current density at 10  $\text{mA cm}^{-2}$ . Overall water splitting performance was evaluated in a two-electrode system by using CoP/NF as the catalysts for HER and OER in 1 M KOH. And the polarization curves were recorded at a scan rate of 2  $\text{mV s}^{-1}$ . All potentials reported in this paper were converted from vs. Ag/AgCl to vs. RHE by adding a value of  $0.197 + 0.059 \cdot \text{pH}$ , and were corrected for ohmic losses.

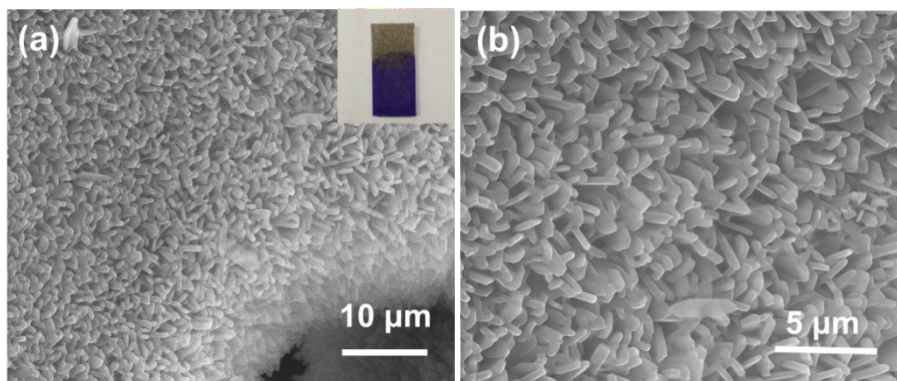

**Figure S1.** SEM images of Co-MOF ( $\text{Co}^{2+}/2\text{-MeIm} : 1/8$ ).

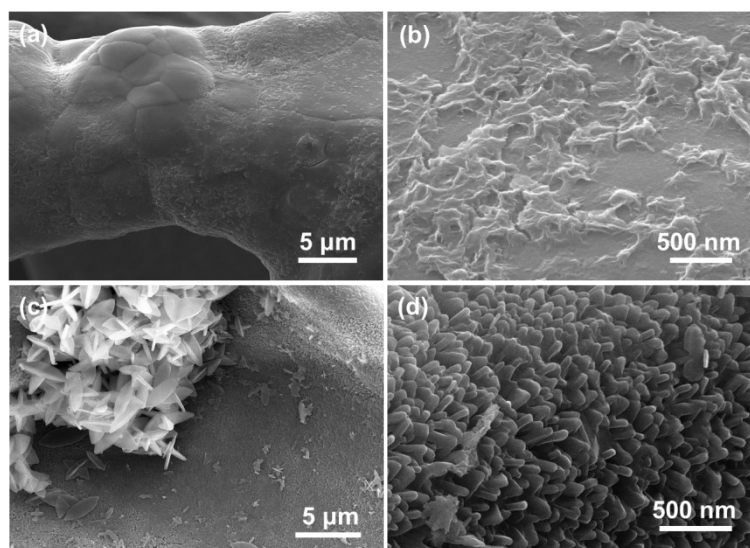

**Figure S2.** SEM images of Co-MOF with the different  $\text{Co}^{2+}/2\text{-MeIm}$  molar ratio: (a,b) 1:4; (c,d) 1:16.

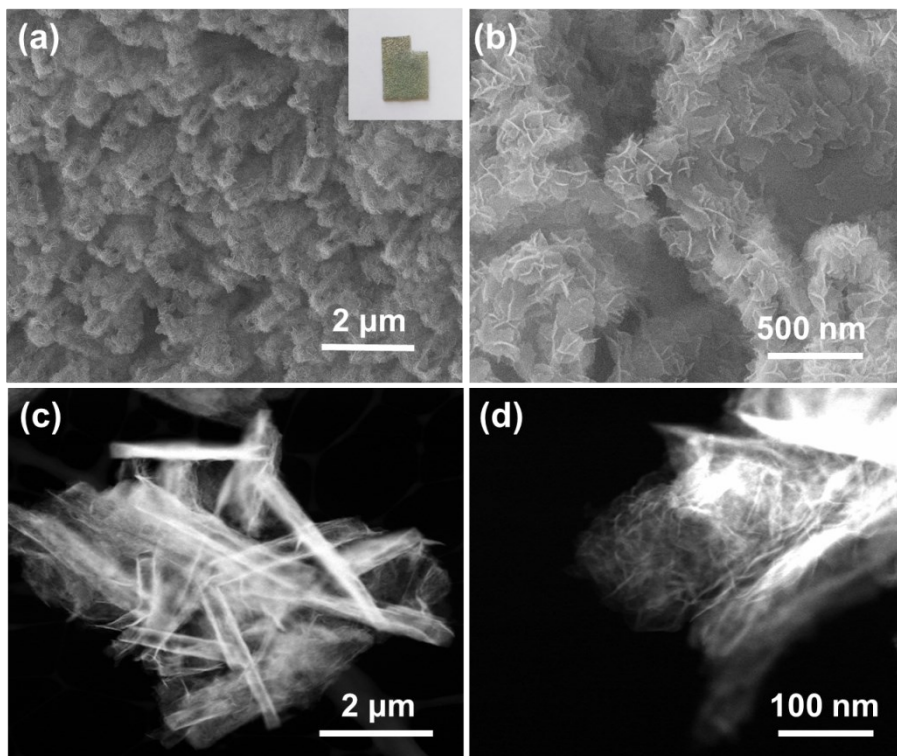

**Figure S3.** (a, b) SEM images and (c, d) TEM images of  $\text{Co(OH)}_2$ .

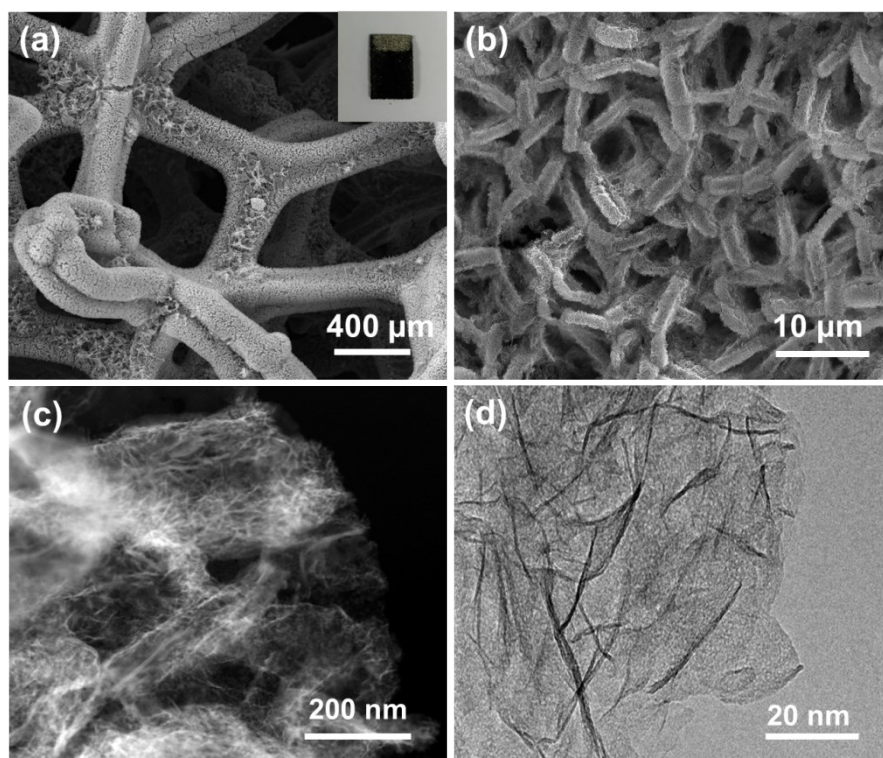

**Figure S4.** (a, b) SEM images and (c, d) TEM images of  $\text{CoP}$ .

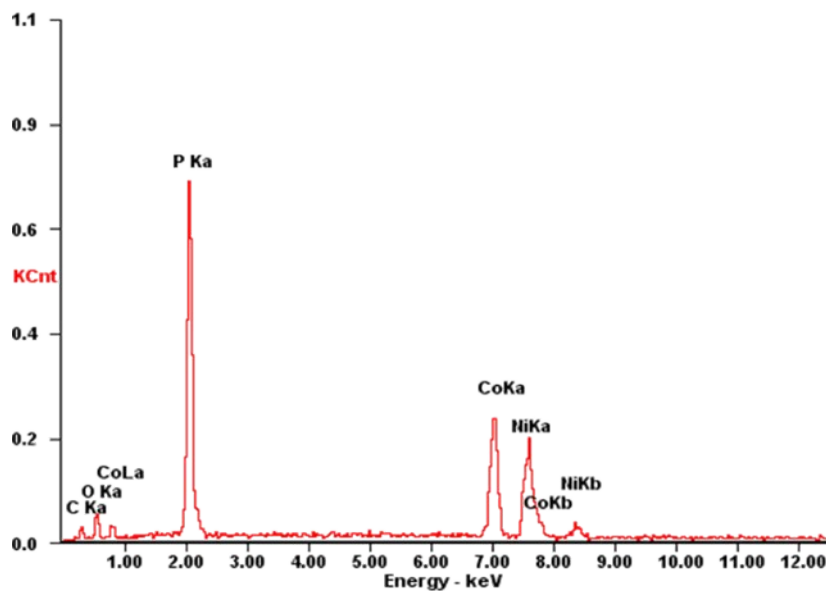

**Figure S5.** EDX spectra of pure CoP.

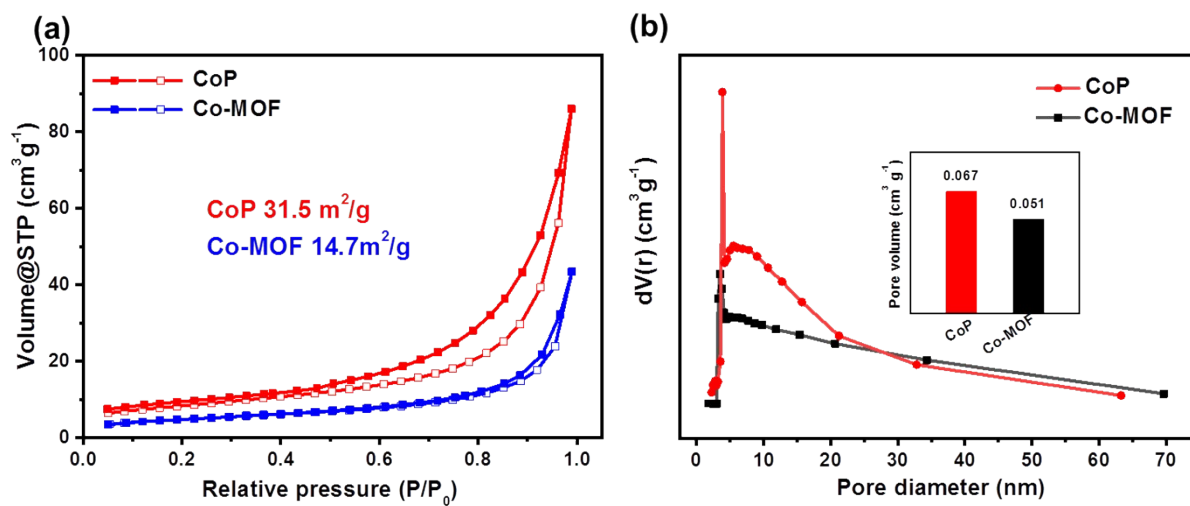

**Figure S6.** (a) N<sub>2</sub> adsorption–desorption isotherms and (b) the pore size distribution curves of CoP and Co-MOF. Inset in Figure S4b: pore volumes of CoP and Co-MOF sample.

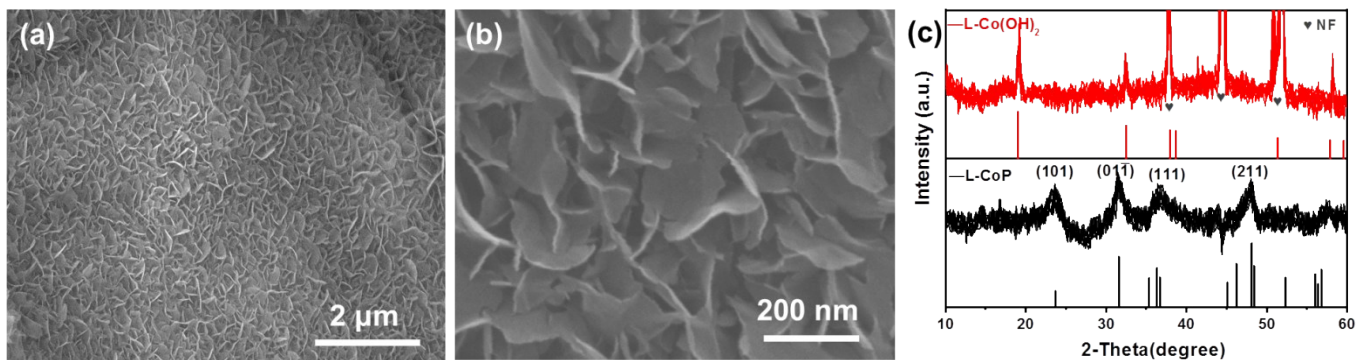

**Figure S7.** (a, b) SEM images of L-CoP/NF, and (c) XRD pattern of L-Co(OH)<sub>2</sub> and L-CoP.

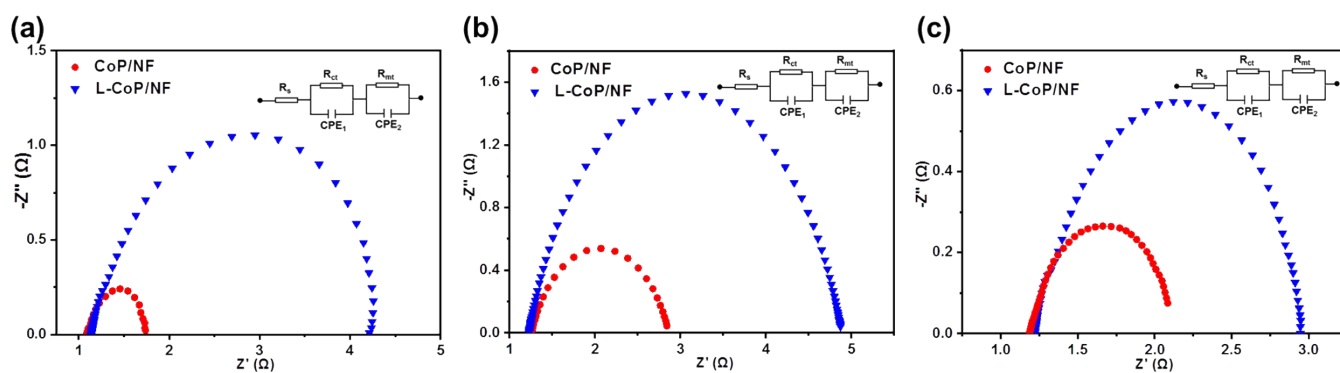

**Figure S8.** Nyquist plots of the as-synthesized CoP/NF and L-CoP/NF catalysts in (a) 1M KOH, (b) 1 M PBS and (c) 0.5 M H<sub>2</sub>SO<sub>4</sub> for HER.

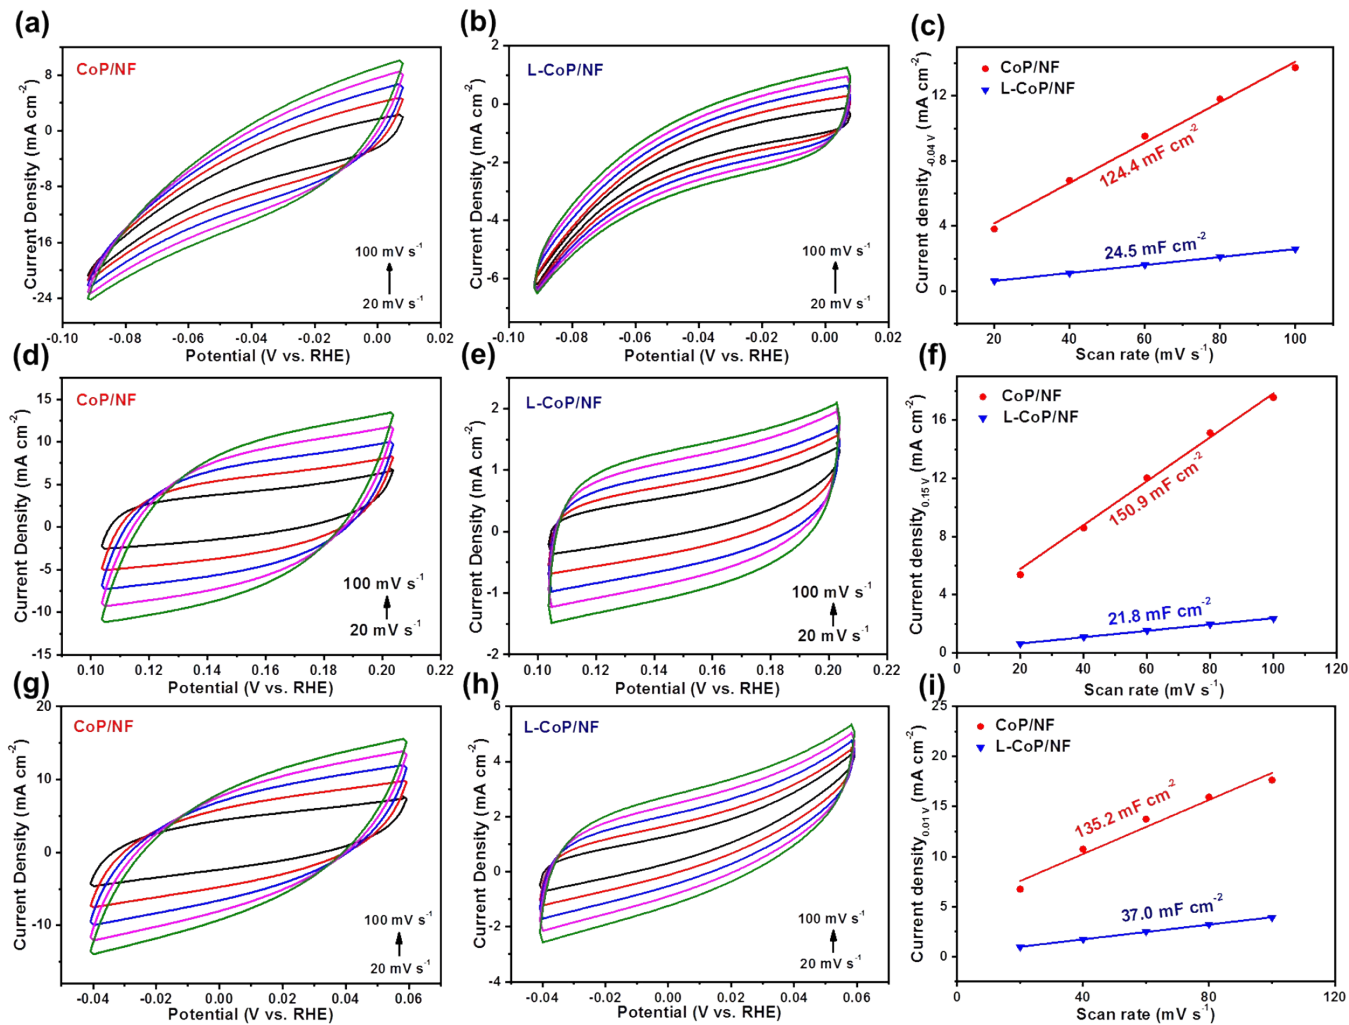

**Figure S9.** ECSA measurement of CoP/NF and L-CoP/NF catalysts in (a-c) 1 M KOH. (d-f) 1M PBS, (g-i) 0.5 M H<sub>2</sub>SO<sub>4</sub>. CV curves of (a, d, g) CoP/NF and (b, e, h) L-CoP/NF. (c, f, i) Plots showing the C<sub>dl</sub> for studied catalysts.

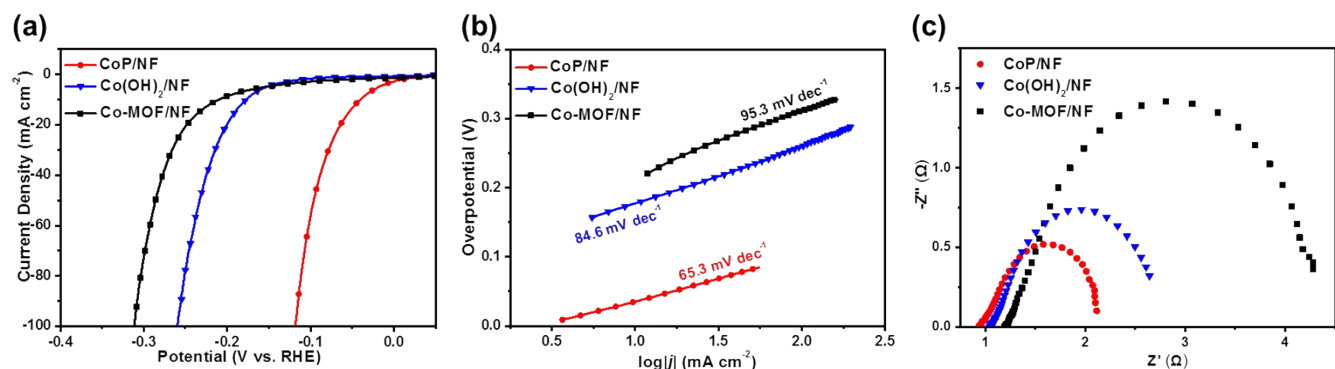

**Figure S10.** The HER activity of CoP/NF, Co(OH)<sub>2</sub>/NF and Co-MOF/NF in 1M KOH: (a) LSV curves, (b) Tafel slopes, and (c) Nyquist plots.



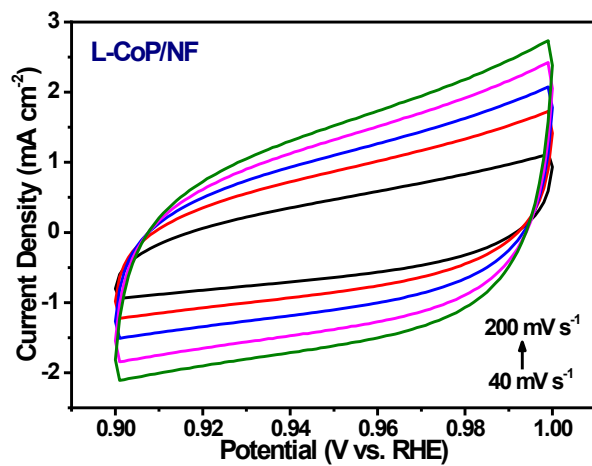

**Figure S11.** The CV curves at different scan rates of the L-CoP/NF for OER.

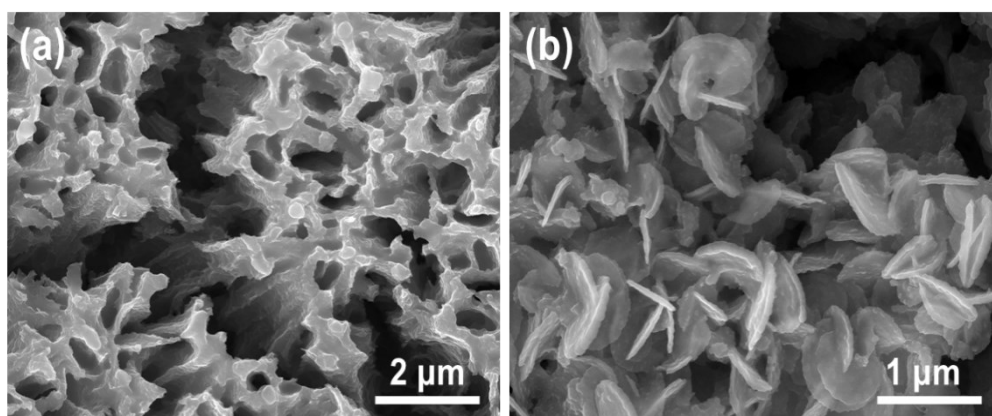

**Figure S12.** SEM images of cathode material after water electrolysis (Post-HER).

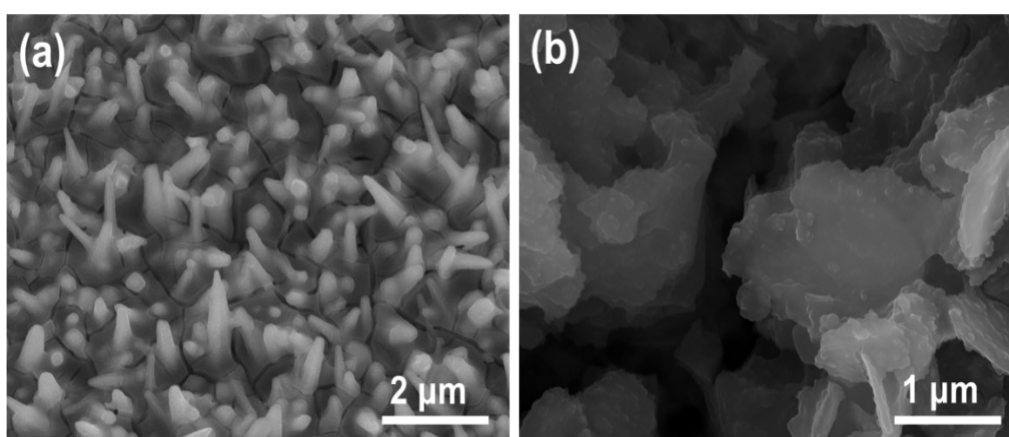

**Figure S13.** SEM images of anode material after water electrolysis (Post-OER).

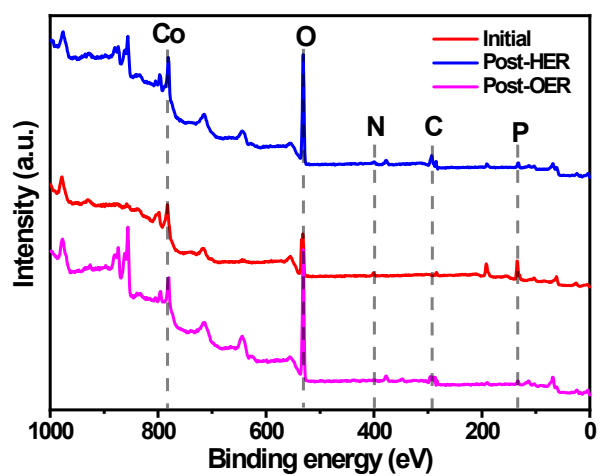

Figure S14. XPS full survey spectra of the CoP/NF after the water electrolysis.

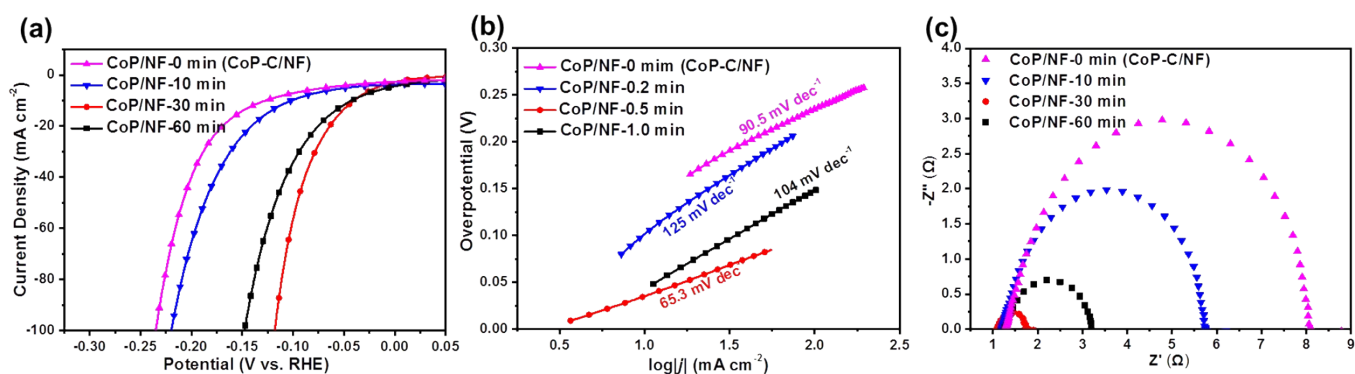

Figure S15. The HER activity of CoP/NF under the different etching time: (a) LSV curves, (b) Tafel slopes and (c) Nyquist plots.

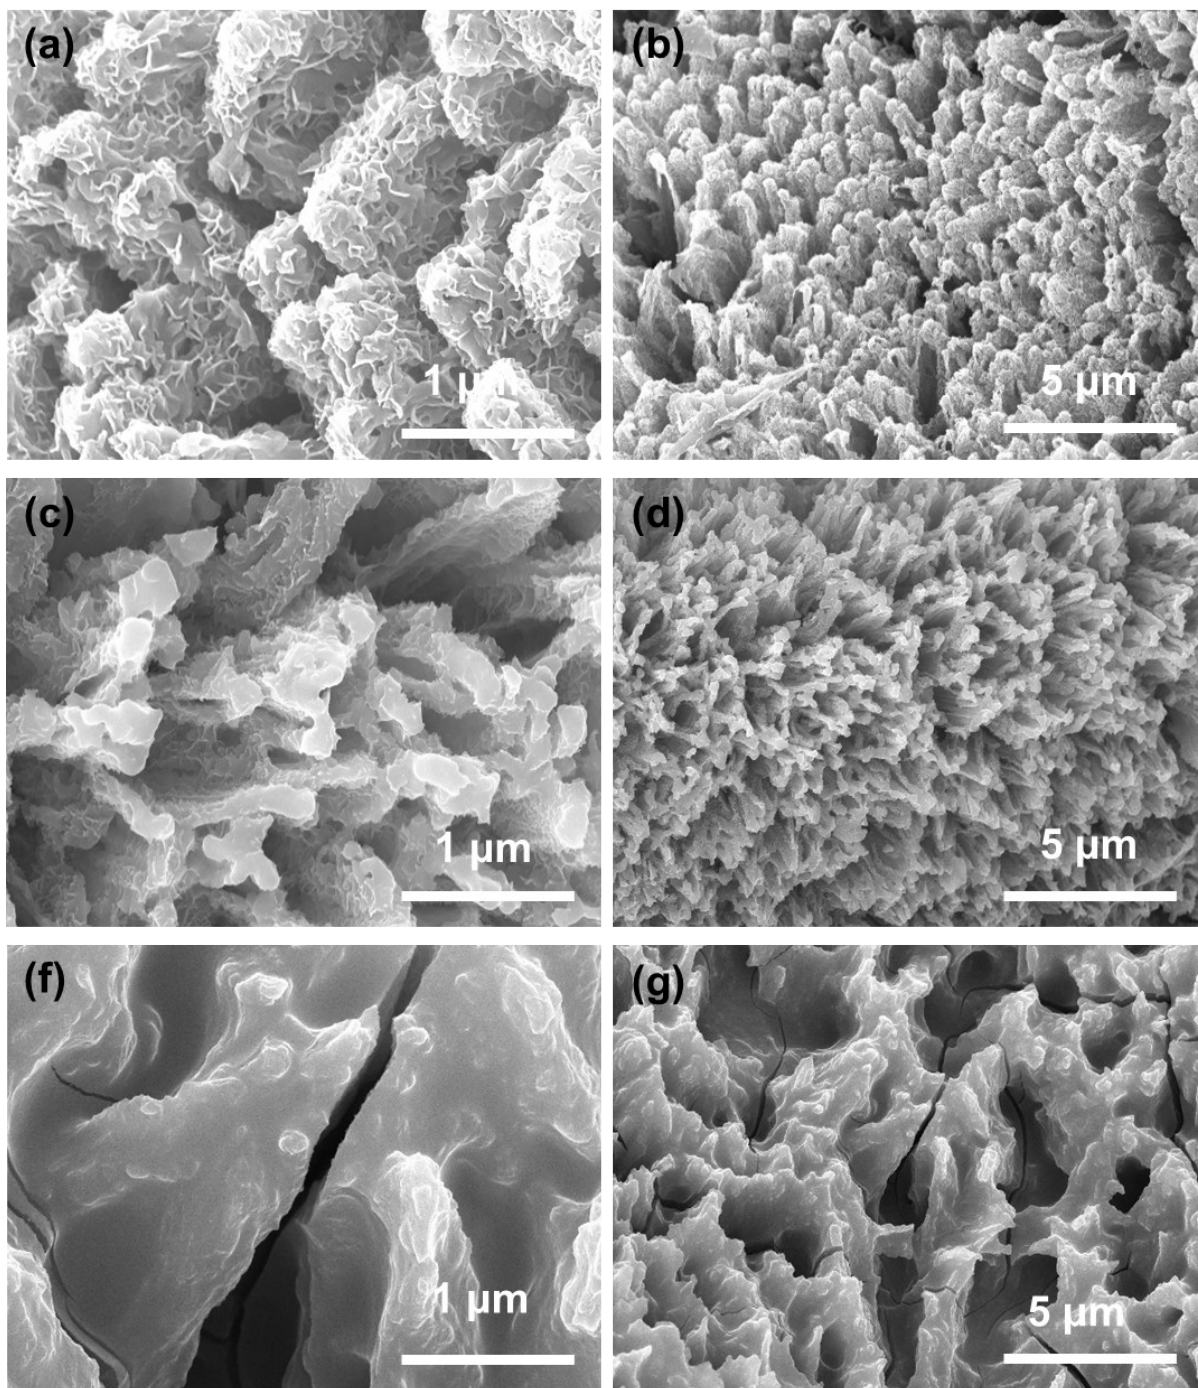

**Figure S16.** SEM images of CoP/NF under different annealing temperatures: (a, b) 250 °C, (c, d) 300 °C, and (e, f) 350 °C.

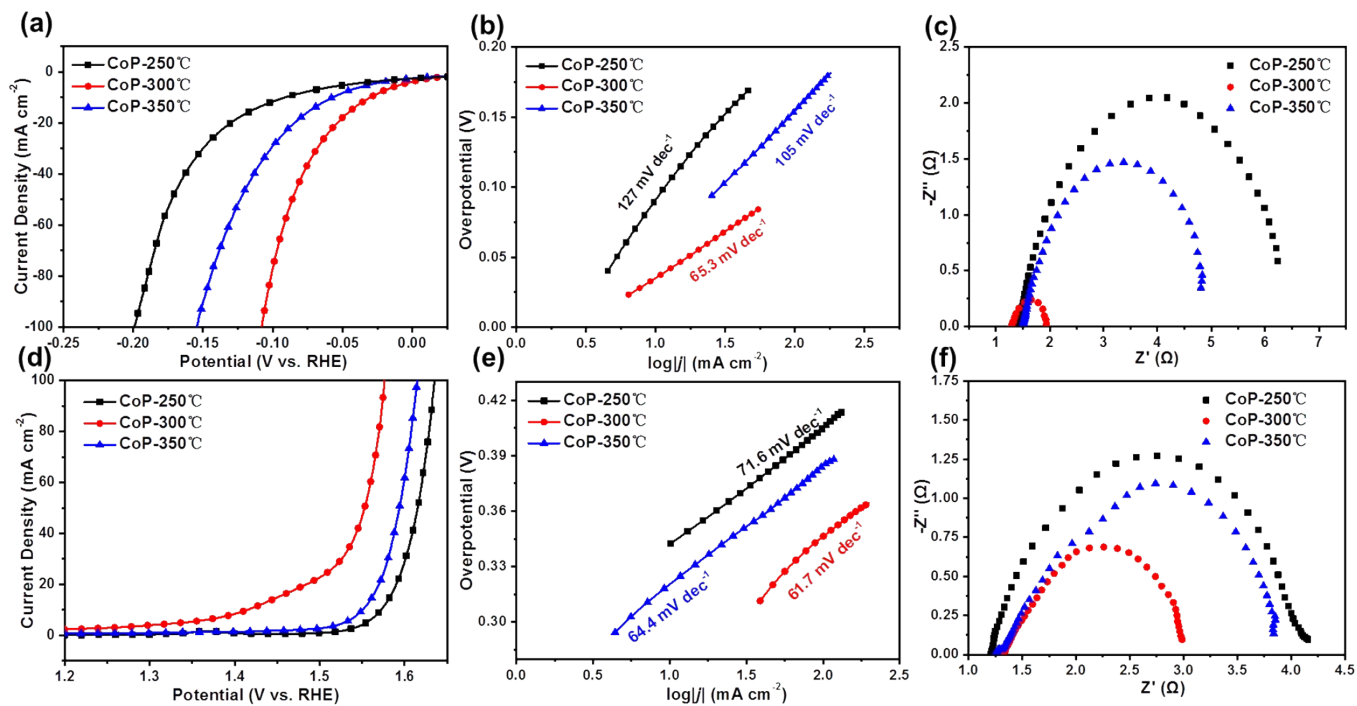

**Figure S17.** (a, d) LSV curves, (b, e) Tafel slopes and (c, f) Nyquist plots of CoP/NF for HER activity (a-c) and OER activity (d-f) at different annealing temperatures in 1M KOH.

**Table S1.** Comparison of the HER activity of the CoP/NF with other electrocatalysts previously reported under various pH conditions.

| Catalysts                                          | Electrolyte                          | $\eta_{10}/\text{mV}$ | Tafel slope/ $\text{mV dec}^{-1}$ | Ref.      |
|----------------------------------------------------|--------------------------------------|-----------------------|-----------------------------------|-----------|
| CoP/NF                                             | 1 M KOH                              | 41.1                  | 65.3                              | This work |
|                                                    | 1 M PBS                              | 55.2                  | 68.7                              |           |
|                                                    | 0.5 M H <sub>2</sub> SO <sub>4</sub> | 83.9                  | 55                                |           |
| CoP/Mo <sub>2</sub> C-NC                           | 1 M KOH                              | 67.2                  | 66                                | 1         |
|                                                    | 1 M PBS                              | 81.8                  | 68                                |           |
|                                                    | 0.5 M H <sub>2</sub> SO <sub>4</sub> | 55.7                  | 49                                |           |
| NFP/C-3                                            | 1 M KOH                              | 95                    | 72                                | 2         |
|                                                    | 1 M PBS                              | 117                   | 70                                |           |
|                                                    | 0.5 M H <sub>2</sub> SO <sub>4</sub> | 72                    | 54                                |           |
| CoP NFs                                            | 1 M KOH                              | 136                   | 56.2                              | 3         |
|                                                    | 1 M PBS                              | -                     | -                                 |           |
|                                                    | 0.5 M H <sub>2</sub> SO <sub>4</sub> | 122                   | 54.8                              |           |
| CoP/NCNT-CP                                        | 1 M KOH                              | 165                   | 96                                | 4         |
|                                                    | 1 M PBS                              | 305                   | 100                               |           |
|                                                    | 0.5 M H <sub>2</sub> SO <sub>4</sub> | 203                   | 56                                |           |
| NiCo-nitrides/NiCo <sub>2</sub> O <sub>4</sub> /GF | 1 M KOH                              | 71                    | 58                                | 5         |
|                                                    | 1 M KOH                              | 418                   | 78                                |           |
|                                                    | 0.5 M H <sub>2</sub> SO <sub>4</sub> | 432                   | 68                                |           |
| Ni-Co-P-H                                          | 1 M KOH                              | 121                   | 65                                | 6         |
|                                                    | 1 M PBS                              | 157                   | 84                                |           |
|                                                    | 0.5 M H <sub>2</sub> SO <sub>4</sub> | 90                    | 68                                |           |
| CoP NA/CC                                          | 1 M KOH                              | 52                    | 58                                | 7         |
|                                                    | 1 M PBS                              | 145                   | 72                                |           |
|                                                    | 0.5 M H <sub>2</sub> SO <sub>4</sub> | -                     | -                                 |           |
| MoS <sub>2</sub> /EEBP                             | 1 M KOH                              | 237                   | 99                                | 8         |
|                                                    | 1 M PBS                              | 258                   | 154                               |           |
|                                                    | 0.5 M H <sub>2</sub> SO <sub>4</sub> | 126                   | 68                                |           |
| Mo <sub>2</sub> C/N-PC                             | 1 M KOH                              | 100                   | 94.5                              | 9         |
|                                                    | 1 M PBS                              | 224                   | 140.8                             |           |
|                                                    | 0.5 M H <sub>2</sub> SO <sub>4</sub> | 178                   | 72.3                              |           |
| Co <sub>2</sub> Ni <sub>1</sub> N                  | 1 M KOH                              | 102.6                 | 60.1                              | 10        |
|                                                    | 1 M PBS                              | 152.8                 | 90.3                              |           |
|                                                    | 0.5 M H <sub>2</sub> SO <sub>4</sub> | 92.0                  | 55.3                              |           |
| NiCoP/CC                                           | 1 M KOH                              | 62                    | 68.2                              | 11        |
|                                                    | 1 M PBS                              | -                     | -                                 |           |
|                                                    | 0.5 M H <sub>2</sub> SO <sub>4</sub> | 44                    | 38.5                              |           |
| CuCo <sub>2</sub> -P                               | 1 M KOH                              | 49.5                  | 58                                | 12        |
|                                                    | 1 M PBS                              | 62.3                  | 65.6                              |           |
|                                                    | 0.5 M H <sub>2</sub> SO <sub>4</sub> | 54.8                  | 42.6                              |           |
| CoP/Co-MOF                                         | 1 M KOH                              | 34                    | 56                                | 13        |
|                                                    | 1 M PBS                              | 49                    | 63                                |           |
|                                                    | 0.5 M H <sub>2</sub> SO <sub>4</sub> | 27                    | 43                                |           |
| Ni-Fe-P                                            | 1 M KOH                              | 95                    | 72                                | 14        |
|                                                    | 1 M PBS                              | 117                   | 70                                |           |
|                                                    | 0.5 M H <sub>2</sub> SO <sub>4</sub> | 72                    | 54                                |           |
| Co-Fe-P                                            | 1 M KOH                              | 86                    | 66                                | 15        |
|                                                    | 1 M PBS                              | 138                   | 72                                |           |
|                                                    | 0.5 M H <sub>2</sub> SO <sub>4</sub> | 66                    | 138                               |           |

**Table S2.** Comparison of the OER activity of CoP/NF with other electrocatalysts previously reported under

alkaline conditions

| Catalysts                                            | Electrolyte | Overpotential (mV)        | Tafel slope/<br>mV dec <sup>-1</sup> | Ref.      |
|------------------------------------------------------|-------------|---------------------------|--------------------------------------|-----------|
| CoP/NF                                               | 1 M KOH     | 317@50mA cm <sup>-2</sup> | 49                                   | This work |
| Cu <sub>3</sub> NCu <sub>3</sub> P/<br>NPSCNWS@NF    | 1 M KOH     | 240@10mA cm <sup>-2</sup> | 53.8                                 | 16        |
| NiCoFeP/C                                            | 1 M KOH     | 270@10mA cm <sup>-2</sup> | 65                                   | 17        |
| CoP/NCNHP                                            | 1 M KOH     | 310@10mA cm <sup>-2</sup> | 70                                   | 18        |
| CoP NA/CC                                            | 1 M KOH     | 300@10mA cm <sup>-2</sup> | 85                                   | 7         |
| CoP/rGO-400                                          | 1 M KOH     | 379@20mA cm <sup>-2</sup> | 66                                   | 19        |
| Fe-CoP/CoO                                           | 1 M KOH     | 219@10mA cm <sup>-2</sup> | 52                                   | 20        |
| Fe <sub>3</sub> -NiCoP                               | 1 M KOH     | 293@50mA cm <sup>-2</sup> | 37.8                                 | 21        |
| NiCoP@NC NA/NF                                       | 1 M KOH     | 305@50mA cm <sup>-2</sup> | 70.5                                 | 22        |
| NiCoP/CC                                             | 1 M KOH     | 242@10mA cm <sup>-2</sup> | 64.2                                 | 11        |
| Co <sub>3</sub> O <sub>4</sub> /Co-Fe oxide<br>DSNBs | 1 M KOH     | 297@10mA cm <sup>-2</sup> | 61                                   | 23        |
| 2D Co <sub>3</sub> O <sub>4</sub> /CBTC              | 1 M KOH     | 370@10mA cm <sup>-2</sup> | 50.1                                 | 24        |
| Co <sub>4</sub> Ni <sub>1</sub> P NTS                | 1 M KOH     | 245@10mA cm <sup>-2</sup> | 61                                   | 25        |
| NiCoP/NC PHCs                                        | 1 M KOH     | 297@10mA cm <sup>-2</sup> | 51                                   | 26        |

**Table S3.** Comparison of the overall water splitting activity of CoP/NF with other electrocatalysts previously

reported under alkaline conditions

| Catalysts                                         | Electrolyte | $\eta_{10, \text{overall}}/\text{mV}$ | Ref.      |
|---------------------------------------------------|-------------|---------------------------------------|-----------|
| CoP/NF                                            | 1 M KOH     | 1.54                                  | This work |
| Cu <sub>3</sub> NCu <sub>3</sub> P/ NPSCNWS@NF    | 1 M KOH     | 1.54                                  | 16        |
| Co <sub>4</sub> Ni <sub>1</sub> P NTs             | 1 M KOH     | 1.59                                  | 25        |
| CoP/NCNHP                                         | 1 M KOH     | 1.64                                  | 18        |
| CoP NA/CC                                         | 1 M KOH     | 1.65                                  | 7         |
| CoP/rGO-400                                       | 1 M KOH     | 1.7                                   | 19        |
| S-CoW@S,N-C                                       | 1 M KOH     | 1.65                                  | 27        |
| Fe <sub>3</sub> -NiCoP                            | 1 M KOH     | 1.61                                  | 21        |
| CoP NFs                                           | 1 M KOH     | 1.65                                  | 3         |
| NiCoP@NC NA/NF                                    | 1 M KOH     | 1.56                                  | 22        |
| Co <sub>3</sub> O <sub>4</sub> /Co-Fe oxide DSNBs | 1 M KOH     | 1.7                                   | 23        |
| NiFe-MOF                                          | 1 M KOH     | 1.57                                  | 28        |
| AP-CoFe <sub>2</sub> O <sub>4</sub>               | 1 M KOH     | 1.63                                  | 29        |
| RuNi-NCNFs                                        | 1 M KOH     | 1.56                                  | 30        |
| NiFe/NiCo <sub>2</sub> O <sub>4</sub> /NF         | 1 M KOH     | 1.67                                  | 31        |
| Ni@NC-800                                         | 1 M KOH     | 1.6                                   | 32        |

## References:

- 1 Luo, X.; Zhou, Q.; Du, S.; Li, J.; Zhang, L.; Lin, K.; Li, H.; Chen, B.; Wu, T.; Chen, D.; Chang, M.; Liu, Y., *ACS Appl Mater Interfaces*, 2018, **10**,42335-42347.
- 2 Lu, X. F.; Yu, L.; Lou, X. W., *Sci. Adv.*, 2019, **5**,eaav6009.
- 3 Ji, L.; Wang, J.; Teng, X.; Meyer, T. J.; Chen, Z., *ACS Catal.*, 2019, **10**,412-419.
- 4 Wang, L.; Cao, J.; Cheng, X.; Lei, C.; Dai, Q.; Yang, B.; Li, Z.; Younis, M. A.; Lei, L.; Hou, Y.; Ostrikov, K., *ACS Sustainable Chem. Eng.*, 2019, **7**,10044-10051.
- 5 Liu, Z.; Tan, H.; Liu, D.; Liu, X.; Xin, J.; Xie, J.; Zhao, M.; Song, L.; Dai, L.; Liu, H., *Adv. Sci.*, 2019, **6**,1801829.
- 6 Liu, X.; Deng, S.; Xiao, D.; Gong, M.; Liang, J.; Zhao, T.; Shen, T.; Wang, D., *ACS Appl. Mater. Interfaces* 2019, **11**,42233-42242.
- 7 Liu, T.; Xie, L.; Yang, J.; Kong, R.; Du, G.; Asiri, A. M.; Sun, X.; Chen, L., *ChemElectroChem*, 2017, **4**,1840-1845.
- 8 Liang, T.; Liu, Y.; Cheng, Y.; Ma, F.; Dai, Z., *ChemCatChem*, 2020, **12**,2840-2848.
- 9 Han, W.; Chen, L.; Ma, B.; Wang, J.; Song, W.; Fan, X.; Li, Y.; Zhang, F.; Peng, W., *J. Mater. Chem. A*, 2019, **7**,4734-4743.
- 10 Feng, X.; Wang, H.; Bo, X.; Guo, L., *ACS Appl. Mater. Interfaces*, 2019, **11**,8018-8024.
- 11 Du, C.; Yang, L.; Yang, F.; Cheng, G.; Luo, W., *ACS Catal.*, 2017, **7**,4131-4137.

- 12 Cheng, Y.; Pei, Y.; Zhuang, P.; Chu, H.; Cao, Y.; Smith, W.; Dong, P.; Shen, J.; Ye, M.; Ajayan, P. M., *Small*, 2019, **15**,1904681.
- 13 Liu, T.; Li, P.; Yao, N.; Cheng, G.; Chen, S.; Luo, W.; Yin, Y., *Angew. Chem. Int. Ed.*, 2019, **58**,4679-4684.
- 14 Ahn, S. H.; Manthiram, A., *J. Mater. Chem. A*, 2017, **5**,2496-2503.
- 15 Chen, J.; Liu, J.; Xie, J.-Q.; Ye, H.; Fu, X.-Z.; Sun, R.; Wong, C.-P., *Nano Energy*, 2019, **56**,225-233.
- 16 Wang, Q.; Zhang, Z.; Zhao, X.; Xiao, J.; Manoj, D.; Wei, F.; Xiao, F.; Wang, H.; Wang, S., *ChemElectroChem*, 2020, **7**,289-298.
- 17 Wei, X.; Zhang, Y.; He, H.; Peng, L.; Xiao, S.; Yao, S.; Xiao, P., *Chem. Commun.*, 2019, **55**,10896-10899.
- 18 Pan, Y.; Sun, K.; Liu, S.; Cao, X.; Wu, K.; Cheong, W. C.; Chen, Z.; Wang, Y.; Li, Y.; Liu, Y.; Wang, D.; Peng, Q.; Chen, C.; Li, Y., *J. Am. Chem. Soc.*, 2018, **140**,2610-2618.
- 19 Jiao, L.; Zhou, Y. X.; Jiang, H. L., *Chem. Sci.*, 2016, **7**,1690-1695.
- 20 Hu, X.; Zhang, S.; Sun, J.; Yu, L.; Qian, X.; Hu, R.; Wang, Y.; Zhao, H.; Zhu, J., *Nano Energy*, 2019, **56**,109-117.
- 21 Guo, M.; Song, S.; Zhang, S.; Yan, Y.; Zhan, K.; Yang, J.; Zhao, B., *ACS Sustainable Chem. Eng.*, 2020, **8**,7436-7444.
- 22 Cao, B.; Cheng, Y.; Hu, M.; Jing, P.; Ma, Z.; Liu, B.; Gao, R.; Zhang, J., *Adv. Funct. Mater.*, 2019, **29**,1906316.
- 23 Wang, X.; Yu, L.; Guan, B. Y.; Song, S.; Lou, X. W. D., *Adv. Mater.*, 2018, **30**,1801211.
- 24 Zhou, J.; Dou, Y.; Zhou, A.; Shu, L.; Chen, Y.; Li, J.-R., *ACS Energy Lett.*, 2018, **3**,1655-1661.
- 25 Yan, L.; Cao, L.; Dai, P.; Gu, X.; Liu, D.; Li, L.; Wang, Y.; Zhao, X., *Adv. Funct. Mater.*, 2017, **27**,1703455.
- 26 Zhang, X.; Huang, L.; Wang, Q.; Dong, S., *J. Mater. Chem. A*, 2017, **5**,18839-18844.
- 27 Weng, B.; Grice, C. R.; Meng, W.; Guan, L.; Xu, F.; Yu, Y.; Wang, C.; Zhao, D.; Yan, Y., *ACS Energy Lett.*, 2018, **3**,1434-1442.
- 28 Duan, J.; Chen, S.; Zhao, C., *Nat Commun*, 2017, **8**,15341.
- 29 Debnath, B.; Parvin, S.; Dixit, H.; Bhattacharyya, S., *ChemSusChem*, 2020, **13**,3875-3886.
- 30 Li, M.; Wang, H.; Zhu, W.; Li, W.; Wang, C.; Lu, X., *Adv. Sci.*, 2020, **7**,1901833.
- 31 Xiao, C.; Li, Y.; Lu, X.; Zhao, C., *Adv. Funct. Mater.*, 2016, **26**,3515-3523.
- 32 Xu, Y.; Tu, W.; Zhang, B.; Yin, S.; Huang, Y.; Kraft, M.; Xu, R., *Adv. Mater.*, 2017, **29**,1605957.
